# Supplementary material for: Astragalus Polysaccharide RAP Induces Macrophage Phenotype Polarization to M1 via the Notch Signaling Pathway
Source: MDPI journal article supplement (doi:10.3390/molecules24102016), 2019-05-27
Supplement: s1 [file s1]

# Supplementary Materials: *Astragalus* Polysaccharide RAP Induces Macrophage Phenotype Polarization to M1 via Notch Signaling Pathway

Wei Wei, Zhi-Peng Li, Zhao-Xiang Bian and Quan-Bin Han

Table S1. Primers used in RT-PCR assay.

| Gene name        | Primers |                                 |
|------------------|---------|---------------------------------|
| TNF- $\alpha$    | forward | 5'-ATGAGCACAGAAAGCATGATC-3'     |
|                  | reverse | 5'-TACAGGCTTGTCACATCGAATT-3'    |
| IL-6             | forward | 5'-GATGCTACCAAACATGGATATAATC-3' |
|                  | reverse | 5'-GGTCCTTAGCCACTCCTTCTGTG-3'   |
| iNOS             | forward | 5'-GCCGTGGCCAACATGCTACT-3'      |
|                  | reverse | 5'-GGTCTTCCTGGGCTCGATCTG-3'     |
| CXCL10           | forward | 5'-CCAAGTGCTGCCGTCATTTTC-3'     |
|                  | reverse | 5'-GGCTCGCAGGGATGATTTCAA-3'     |
| Mannose receptor | forward | 5'-CAAGGAAGGTTGGCATTGT-3'       |
|                  | reverse | 5'-CCTTTCAGTCCTTTGCAAGC-3'      |
| Arginase 1       | forward | 5'-TGGCTTGCGAGACGTAGAC-3'       |
|                  | reverse | 5'-GCTCAGGTGAATCGGCCTTTT-3'     |
| Notch 1          | forward | 5'-AGAATGGCATGGTGCCAG-3'        |
|                  | reverse | 5'-TGGTGGAGAGGCTGCTGTGTAG-3'    |
| Notch 2          | forward | 5'-GATGGAGGTGACTGTTCCCTCA-3'    |
|                  | reverse | 5'-CGTCTTGCTATTCTCTGGCAC-3'     |
| Notch 3          | forward | 5'-GATTTCCCATAACCACTTCGG-3'     |
|                  | reverse | 5'-TGTGTAATGCAAAACCCTCAGG-3'    |
| Notch 4          | forward | 5'-GTTGAAGAATTGATCGCAGCC-3'     |
|                  | reverse | 5'-AGGAAAAGCGGCGTCTGTT-3'       |
| Jaddge 1         | forward | 5'-AGAAGTCAGAGTTCAGAGGCGTCC-3'  |
|                  | reverse | 5'-AGTAGAGGCTGTCACCAAGCAAC-3'   |
| Dll 1            | forward | 5'-GGACCTCAGTGAGAGGCATATGG-3'   |
|                  | reverse | 5'-GGCAATTGGCTAGGTTGTTTCATG-3'  |
| $\beta$ -actin   | forward | 5'-TGTCCACCTTCCAGCAGATGT-3'     |
|                  | reverse | 5'-AGCTCAGTAACAGTCCGCCTAGA-3'   |

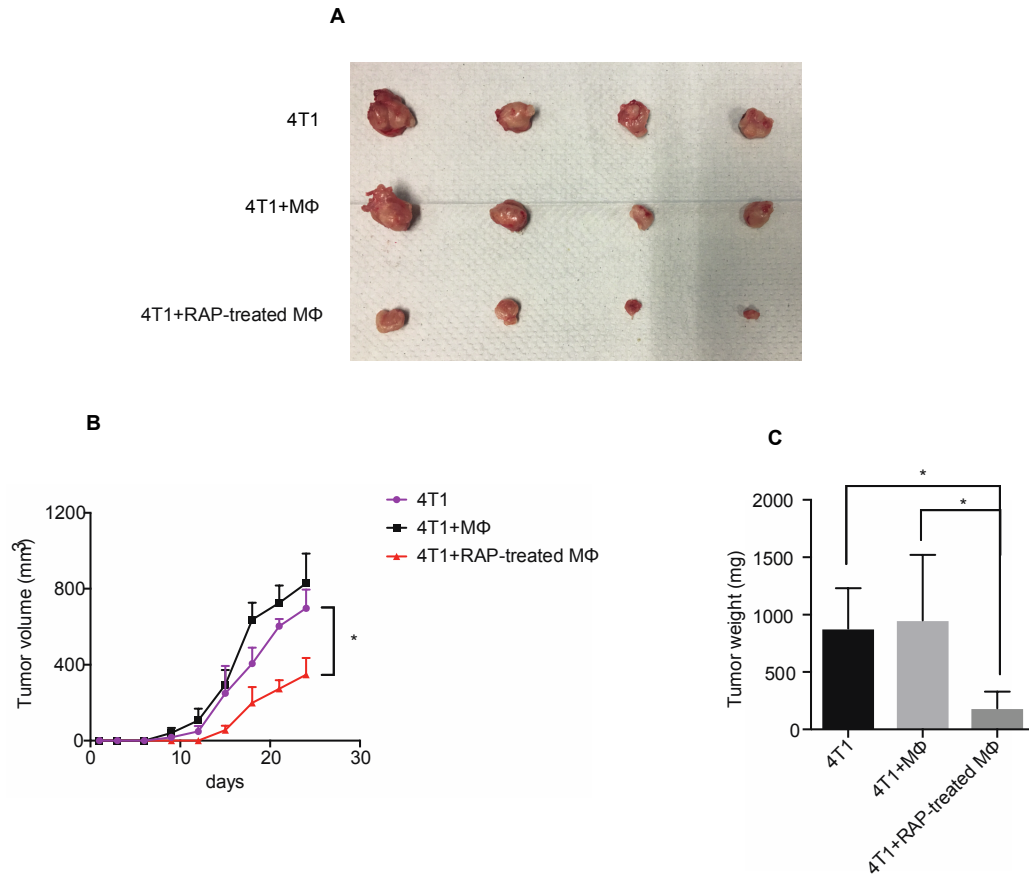

Figure S1. Tumoricidal effect of RAP-stimulated BMDMs in 4T1-induced animal model.

The BALB/c mice (4 mice/group) were injected with 4T1 cells, 4T1 cells plus BMDMs, and 4T1 cells plus RAP-treated BMDMs in mammary grand fat pad. Tumor volumes were measured every 3 days (B), and tumor weight were determined after 26 days. A significant difference of tumor weight was detected by one way ANOVA test ( $p < 0.05$ ) (A and C).

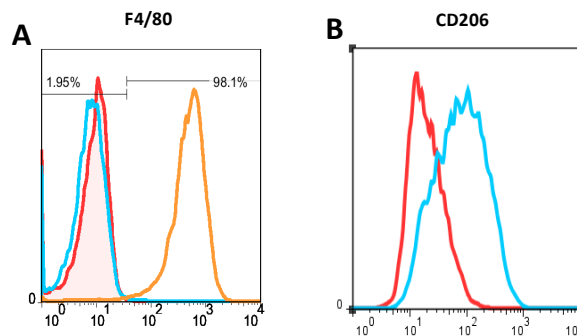

Figure S2. Histogram of F4/80 and CD206 fluorescent intensity of BMDMs induced by MCSF and IL-4 was analyzed by FCM.

(A) The bone marrow cells were treated with or without 10 ng/mL of MCSF for 7 days. Then the cells were stained with APC anti-F4/80 antibody and analyzed with FCM. The red line represents the isotype control. The orange line represents the bone marrow cells treated with 10 ng/mL of MCSF for 7 days. (B) BMDMs treated with or without 20 ng/mL of IL-4 for 24 h were stained with

FITC anti-CD206 antibody and analyzed with FCM. The red line represents the BMDMs. The blue line represents the BMDMs treated with 20 ng/mL of IL-4 for 24 h.

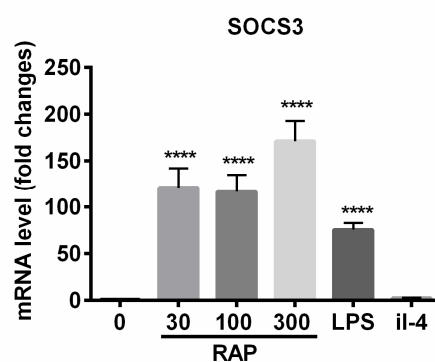

Figure S3. SOCS3 gene expression induced by RAP.
